# Supplementary material for: The Relationship between Urinary Incontinence, Osteoarthritis, and Musculoskeletal System Disorders
Source: MDPI journal article supplement (doi:10.3390/jcm13082272), 2024-04-14
Supplement: s1 [file s1]

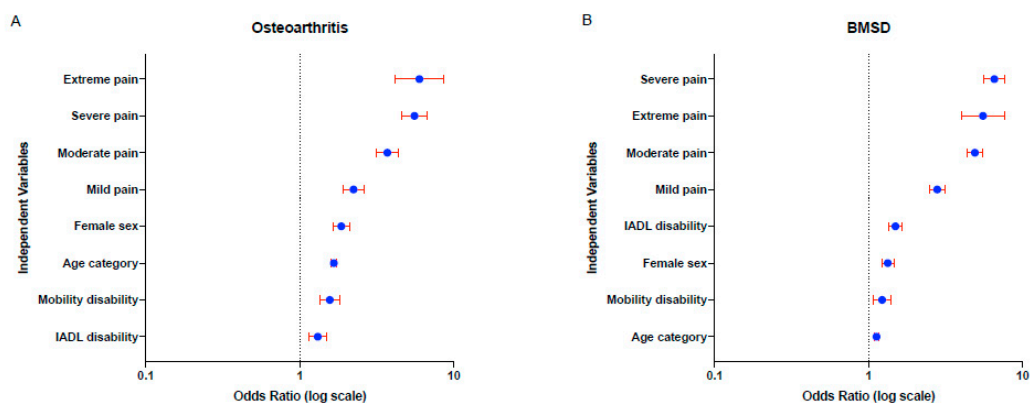

Supplementary Figure S1. Multiple variable logistic regression models for osteoarthritis and back musculoskeletal system disorders (BMSD). Mild, moderate, severe, and extreme pain; age, gender, mobility, and functional impairment were evaluated in these models.

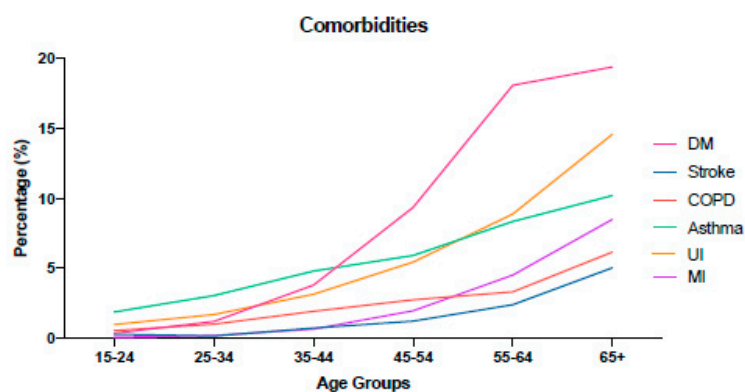

Supplementary Figure S2. Prevalence of chronic conditions by age categories. DM; diabetes mellitus, COPD; chronic obstructive pulmonary disease, UI; urinary incontinence, MI; myocardial infarction
